# Supplementary figures and images for: PAIR3, an axis-associated protein, is essential for the recruitment of recombination elements onto meiotic chromosomes in rice
Source: PubMed Central journal article supplement — Mol Biol Cell. 2011 Jan 1;22(1):12–9. doi: 10.1091/mbc.E10-08-0667 (PMC3016970; doi:10.1091/mbc.e10-08-0667), 2011-01-01

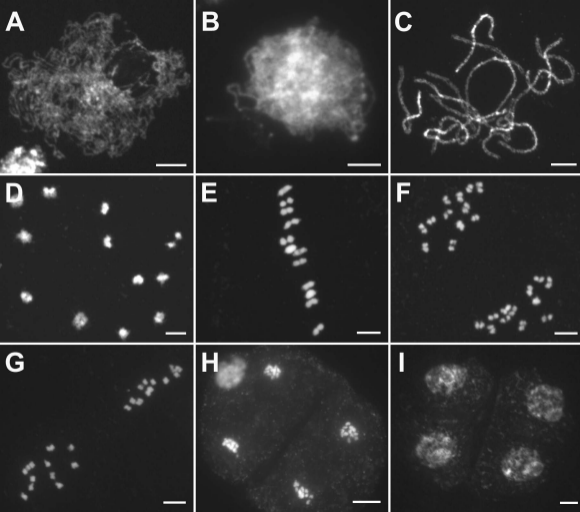

**REC8****PAIR3****Merge**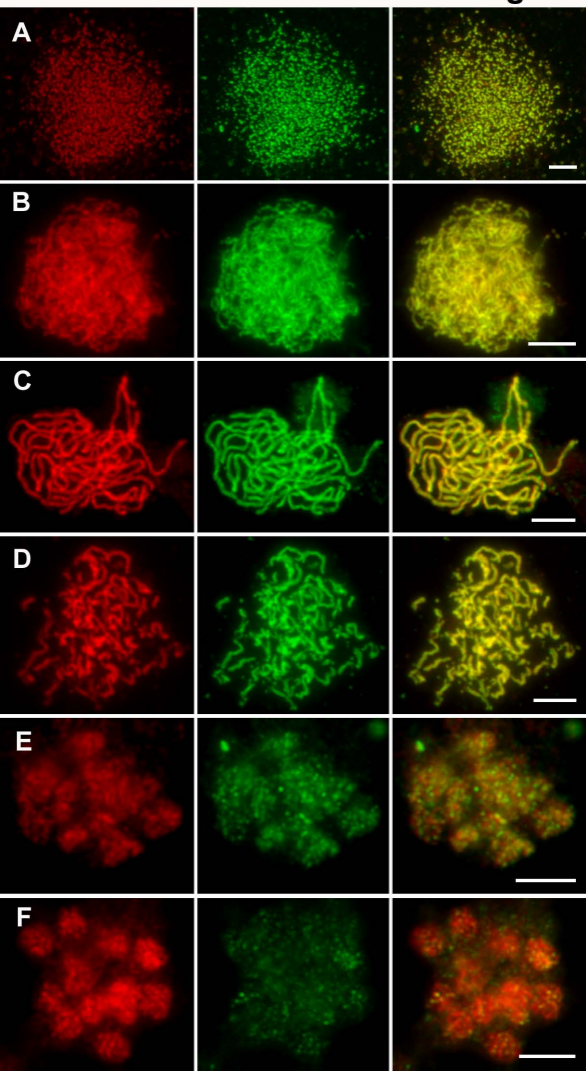

*pair3-1*   *pair3-2*

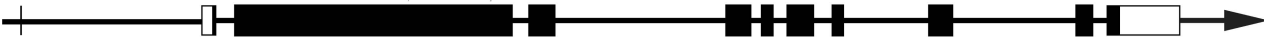

Supplement: E10-08-0667_1.pdf [file E10-08-0667_1.pdf]
